# Supplementary material
Source: HighWire-hosted journal article supplement (https://learnmem.cshlp.org/content/suppl/2023/01/20/30.1.25)
Supplement: Supplement_Material_.docx [file Supplement_Material_.docx]

**Supplemental Material**

| **Table S1**. **Correlation between sleep architecture, behavioural improvement and hippocampal-orbitofrontal connectivity for the sleep and nap conditions**. Correlations for REM sleep in the nap condition based on those who reached REM sleep n=15. All other correlations based on n=20 for both conditions. * p < 0.05. | | | | | | |
| --- | --- | --- | --- | --- | --- | --- |
| **Sleep Group** | | | | | | |
| **Sleep Architecture** | **Accuracy** | | **Speed** | | **HPC-OFC Connectivity** | |
| **r** | **p** | **r** | **p** | **r** | **p** |
| Sleep Efficiency (%) | -0.152 | 0.522 | -0.003 | 0.991 | 0.15 | 0.529 |
| NREM1 (mins) | 0.115 | 0.630 | -0.109 | 0.646 | -0.387 | 0.092 |
| NREM2 (mins) | -0.099 | 0.676 | -0.159 | 0.502 | 0.139 | 0.559 |
| NREM3 (mins) | -0.531 | *0.016 | -0.392 | 0.087 | -0.224 | 0.343 |
| REM (mins) | -0.019 | 0.935 | 0.182 | 0.441 | 0.206 | 0.384 |
| TST (mins) | -0.331 | 0.153 | -0.196 | 0.408 | -0.028 | 0.906 |
| WASO (mins) | 0.124 | 0.602 | -0.029 | 0.904 | -0.245 | 0.297 |
| Awakenings (#) | 0.010 | 0.965 | 0.047 | 0.845 | -0.263 | 0.263 |
| **Nap Group** | | | | | | |
| **Sleep Architecture** | **Accuracy** | | **Speed** | | **HPC-OFC Connectivity** | |
| **r** | **p** | **r** | **p** | **r** | **p** |
| Sleep Efficiency (%) | -0.280 | 0.232 | -0.348 | 0.133 | 0.105 | 0.660 |
| NREM1 (mins) | -0.156 | 0.510 | 0.082 | 0.731 | 0.097 | 0.684 |
| NREM2 (mins) | -0.313 | 0.180 | -0.195 | 0.410 | -0.293 | 0.210 |
| NREM3 (mins) | 0.195 | 0.409 | 0.060 | 0.802 | 0.262 | 0.265 |
| REM (mins) | -0.320 | 0.245 | -0.410 | 0.120 | 0.145 | 0.606 |
| TST (mins) | -0.300 | 0.199 | -0.309 | 0.184 | 0.065 | 0.785 |
| WASO (mins) | 0.271 | 0.249 | 0.345 | 0.136 | -0.176 | 0.458 |
| Awakenings (#) | -0.008 | 0.974 | 0.265 | 0.259 | -0.412 | 0.071 |

| **Table S2. Experimental session sleep architecture for Sleep and Nap conditions.** Percentages expressed in minutes as a proportion of total sleep time. | | | | |
| --- | --- | --- | --- | --- |
|  | **Sleep Condition** | | **Nap Condition** | |
| **Sleep Variable** | **M** | **SD** | **M** | **SD** |
| NREM1 (mins) | 17.23 | 15.28 | 5.63 | 4.52 |
| NREM2 (mins) | 227.10 | 34.73 | 36.92 | 12.76 |
| NREM3 (mins) | 74.90 | 22.51 | 20.04 | 15.76 |
| REM (mins) | 86.06 | 23.86 | 6.21 | 5.52 |
| WASO (mins) | 42.01 | 30.12 | 13.21 | 12.85 |
|  |  |  |  |  |
| NREM1 (%) | 4.25 | 4.58 | 8.18 | 7.85 |
| NREM2 (%) | 56.03 | 5.88 | 53.67 | 16.36 |
| NREM3 (%) | 18.48 | 5.64 | 29.13 | 18.80 |
| REM (%) | 21.23 | 4.93 | 9.02 | 8.06 |
| WASO (%) | 10.36 | 7.43 | 19.2 | 18.6 |
|  |  |  |  |  |
| TST (mins) | 405.29 | 42.58 | 68.79 | 13.62 |
| Sleep Efficiency (%) | 87.59 | 7.70 | 77.97 | 14.56 |
| Awakenings (#) | 30.7 | 7.71 | 6.15 | 3.54 |

**ROI-to-ROI Analysis: Training Session**

Resting-state functional connectivity from before to after the Tower of Hanoi training session *i.e.,* Rest 2 > Rest 1 did not significantly change for any connections among our 6 ROIs. This was demonstrated by examining change from Rest 1 to Rest 2 across all participants all *pFDR*> 0.49, and between groups as examined through a 3x2 Group by Session ANOVA all *pFDR*> 0.27. A one-way ANOVA at Rest 2 comparing Sleep, Nap, and Wake groups also showed no significant differences in functional connectivity all *pFDR*> 0.82.

These results from the initial training period suggest that as expected, any observed changes in functional connectivity across the consolidation interval of sleep, nap, or wake could not be attributed to differences before the consolidation interval.
